# Supplementary material
Source: PubMed Central journal article supplement (PMC7456571)
Supplement: NIHMS1617345-supplement-1.pdf [file NIHMS1617345-supplement-1.pdf]

**Supplemental Table 1.** Child development familiarity: mean number of items correct and percent correct, by ethnicity/language group (N=539)

| <i>Participant Latino ethnicity, race, and English proficiency</i> | <i>Overall Items Correct<br/>(Total possible = 11)</i> |                   |
|--------------------------------------------------------------------|--------------------------------------------------------|-------------------|
|                                                                    | <i>Mean<br/>(SD)</i>                                   | <i>Percentage</i> |
| Non-Latino, white, English proficient (n = 155)                    | 8.2 (2.5)                                              | 74.8              |
| Non-Latino, other race, English proficient (n = 55)                | 6.6 (3.2)                                              | 59.7              |
| Latino, English proficient (n = 100)                               | 7.4 (2.6)                                              | 67.1              |
| Latino, limited English proficiency (n = 191)                      | 7.3 (2.4)                                              | 66.1              |

**Supplemental Table 2.** Percent of families with personal experience with developmental disabilities overall and by ethnicity/language group

| Developmental Disability | Overall % (n) who know someone with the DD | % (95% CI) Non-Latino white | % (95% CI) Non-Latino other race | % (95% CI) Latino-EP | % (95% CI) Latino-LEP |
|--------------------------|--------------------------------------------|-----------------------------|----------------------------------|----------------------|-----------------------|
| ADHD                     | 33.6 (181)                                 | 63.9 (56.0 - 71.1)          | 40.0 (27.9 - 53.5)               | 44.0 (34.6 - 53.9)   | 5.8 (3.2 - 10.1)      |
| Autism spectrum disorder | 28.6 (154)                                 | 43.9 (36.2 - 51.8)          | 40.0 (27.9 - 53.5)               | 30.0 (21.8 - 39.7)   | 16.2 (11.6 - 22.2)    |
| Down syndrome            | 16.5 (89)                                  | 16.1 (11.1 - 22.8)          | 18.2 (10.0 - 30.8)               | 23.0 (15.7 - 32.3)   | 15.7 (11.2 - 21.6)    |
| Intellectual disability  | 13.5 (73)                                  | 21.9 (16.1 - 29.2)          | 25.5 (15.6 - 38.7)               | 13.0 (7.7 - 21.2)    | 4.1 (2.5 - 8.8)       |
| Cleft lip or palate      | 11.0 (59)                                  | 14.8 (10.0 - 21.4)          | 20.0 (11.4 - 32.8)               | 13.0 (7.7 - 21.2)    | 5.2 (2.8 - 9.5)       |
| Cerebral palsy           | 7.2 (39)                                   | 15.5 (10.6 - 22.1)          | 10.9 (4.9 - 22.4)                | 3.0 (1.0 - 9.0)      | 2.1 (0.8 - 5.5)       |
| Rett syndrome            | 0.6 (3)                                    | 1.3 (0.3 - 5.1)             | 1.8 (0.3 - 12.1)                 | 0 (no observations)  | 0 (no observations)   |
| None of the above        | 38.8 (209)                                 | 23.9 (17.8 - 31.3)          | 25.5 (15.6 - 38.7)               | 32.0 (23.6 - 41.8)   | 56.0 (48.9 - 62.9)    |

Abbreviations: ADHD, attention deficit hyperactivity disorder; CI, confidence interval; DD, developmental disability; EP, English proficient; LEP, limited English proficient
